# Supplementary material for: Predicting transcriptional responses to novel chemical perturbations using deep generative model
Source: Research Square preprint supplement (doi:10.21203/rs.3.rs-3917469/v1), 2024-03-20
Supplement: Supplementary file 1 [file 559a92021e28c49fae104128.xlsx]

## Sheet: DMS114
	FDA Approved Drugs	Candidates Drug id	Method	Enrichment score
1	DMS114_AZD4547	10027	enrichment score of fold-change	1.2045
2	DMS114_AZD4547	10037	enrichment score of fold-change	1.2045
3	DMS114_AZD4547	10077	enrichment score of fold-change	1.2045
4	DMS114_AZD4547	1010	enrichment score of fold-change	1.2045
5	DMS114_AZD4547	10124	enrichment score of fold-change	1.2045
6	DMS114_PD173074	0	enrichment score of fold-change	1.2045
7	DMS114_PD173074	100	enrichment score of fold-change	1.2045
8	DMS114_PD173074	1001	enrichment score of fold-change	1.2045
9	DMS114_PD173074	10011	enrichment score of fold-change	1.2045
10	DMS114_PD173074	10012	enrichment score of fold-change	1.2045

## Sheet: H196
	FDA Approved Drugs	Candidates Drug id	Method	Enrichment score
1	H196_JNK Inhibitor VIII	0	enrichment score of fold-change	1.18916
4	H196_JNK Inhibitor VIII	1	enrichment score of fold-change	1.18916
7	H196_JNK Inhibitor VIII	10	enrichment score of fold-change	1.18916
10	H196_JNK Inhibitor VIII	100	enrichment score of fold-change	1.18916
13	H196_JNK Inhibitor VIII	10003	enrichment score of fold-change	1.18916
31	H196_STF-62247	0	enrichment score of fold-change	1.18916
34	H196_STF-62247	100	enrichment score of fold-change	1.18916
37	H196_STF-62247	10006	enrichment score of fold-change	1.18916
40	H196_STF-62247	10007	enrichment score of fold-change	1.18916
43	H196_STF-62247	10011	enrichment score of fold-change	1.18916
16	H196_SGC0946	11247	enrichment score of fold-change	1.18814
19	H196_SGC0946	12043	enrichment score of fold-change	1.18814
22	H196_SGC0946	3369	enrichment score of fold-change	1.18814
25	H196_SGC0946	5832	enrichment score of fold-change	1.18814
28	H196_SGC0946	10155	enrichment score of fold-change	1.1877

## Sheet: H209
	FDA Approved Drugs	Candidates Drug id	Method	Enrichment score
76	H209_Olaparib	1000	enrichment score of fold-change	1.21677
79	H209_Olaparib	10005	enrichment score of fold-change	1.21677
82	H209_Olaparib	10018	enrichment score of fold-change	1.21677
85	H209_Olaparib	10024	enrichment score of fold-change	1.21677
88	H209_Olaparib	10026	enrichment score of fold-change	1.21677
226	H209_ascorbate (vitamin C)	1	enrichment score of fold-change	1.21677
229	H209_ascorbate (vitamin C)	10	enrichment score of fold-change	1.21677
232	H209_ascorbate (vitamin C)	100	enrichment score of fold-change	1.21677
235	H209_ascorbate (vitamin C)	1000	enrichment score of fold-change	1.21677
238	H209_ascorbate (vitamin C)	10005	enrichment score of fold-change	1.21677
91	H209_PLX-4720	100	enrichment score of fold-change	1.21575
94	H209_PLX-4720	10010	enrichment score of fold-change	1.21575
97	H209_PLX-4720	10011	enrichment score of fold-change	1.21575
100	H209_PLX-4720	10012	enrichment score of fold-change	1.21575
103	H209_PLX-4720	10014	enrichment score of fold-change	1.21575
151	H209_Talazoparib	10	enrichment score of fold-change	1.21575
154	H209_Talazoparib	10079	enrichment score of fold-change	1.21575
157	H209_Talazoparib	10087	enrichment score of fold-change	1.21575
160	H209_Talazoparib	10117	enrichment score of fold-change	1.21575
163	H209_Talazoparib	10124	enrichment score of fold-change	1.21575
16	H209_Carmustine	1	enrichment score of fold-change	1.21472
19	H209_Carmustine	10003	enrichment score of fold-change	1.21472
22	H209_Carmustine	10004	enrichment score of fold-change	1.21472
25	H209_Carmustine	10005	enrichment score of fold-change	1.21472
28	H209_Carmustine	10007	enrichment score of fold-change	1.21472
46	H209_Navitoclax	100	enrichment score of fold-change	1.21472
49	H209_Navitoclax	10006	enrichment score of fold-change	1.21472
52	H209_Navitoclax	10009	enrichment score of fold-change	1.21472
55	H209_Navitoclax	10010	enrichment score of fold-change	1.21472
58	H209_Navitoclax	10011	enrichment score of fold-change	1.21472
61	H209_Niraparib	1	enrichment score of fold-change	1.21472
64	H209_Niraparib	10003	enrichment score of fold-change	1.21472
67	H209_Niraparib	10004	enrichment score of fold-change	1.21472
70	H209_Niraparib	10005	enrichment score of fold-change	1.21472
73	H209_Niraparib	10007	enrichment score of fold-change	1.21472
106	H209_Rucaparib	0	enrichment score of fold-change	1.21472
109	H209_Rucaparib	10	enrichment score of fold-change	1.21472
112	H209_Rucaparib	100	enrichment score of fold-change	1.21472
115	H209_Rucaparib	10001	enrichment score of fold-change	1.21472
118	H209_Rucaparib	10010	enrichment score of fold-change	1.21472
166	H209_Topotecan	10006	enrichment score of fold-change	1.21472
169	H209_Topotecan	10016	enrichment score of fold-change	1.21472
172	H209_Topotecan	10021	enrichment score of fold-change	1.21472
175	H209_Topotecan	10022	enrichment score of fold-change	1.21472
178	H209_Topotecan	10066	enrichment score of fold-change	1.21472
181	H209_Veliparib	1	enrichment score of fold-change	1.21472
184	H209_Veliparib	10003	enrichment score of fold-change	1.21472
187	H209_Veliparib	10004	enrichment score of fold-change	1.21472
190	H209_Veliparib	10005	enrichment score of fold-change	1.21472
193	H209_Veliparib	10007	enrichment score of fold-change	1.21472
196	H209_Venetoclax	100	enrichment score of fold-change	1.21472
199	H209_Venetoclax	10006	enrichment score of fold-change	1.21472
202	H209_Venetoclax	10009	enrichment score of fold-change	1.21472
205	H209_Venetoclax	10010	enrichment score of fold-change	1.21472
208	H209_Venetoclax	10011	enrichment score of fold-change	1.21472
211	H209_WZ4003	0	enrichment score of fold-change	1.21472
214	H209_WZ4003	10	enrichment score of fold-change	1.21472
217	H209_WZ4003	100	enrichment score of fold-change	1.21472
220	H209_WZ4003	10001	enrichment score of fold-change	1.21472
223	H209_WZ4003	10010	enrichment score of fold-change	1.21472
1	H209_ABT737	0	enrichment score of fold-change	1.2137
4	H209_ABT737	10	enrichment score of fold-change	1.2137
7	H209_ABT737	100	enrichment score of fold-change	1.2137
10	H209_ABT737	10001	enrichment score of fold-change	1.2137
13	H209_ABT737	10006	enrichment score of fold-change	1.2137
136	H209_Serdemetan	0	enrichment score of fold-change	1.2137
139	H209_Serdemetan	10	enrichment score of fold-change	1.2137
142	H209_Serdemetan	100	enrichment score of fold-change	1.2137
145	H209_Serdemetan	10001	enrichment score of fold-change	1.2137
148	H209_Serdemetan	10006	enrichment score of fold-change	1.2137
31	H209_Irinotecan	1	enrichment score of fold-change	1.21268
34	H209_Irinotecan	10	enrichment score of fold-change	1.21268
37	H209_Irinotecan	100	enrichment score of fold-change	1.21268
40	H209_Irinotecan	10000	enrichment score of fold-change	1.21268
43	H209_Irinotecan	10005	enrichment score of fold-change	1.21268
121	H209_SN-38	1	enrichment score of fold-change	1.21268
124	H209_SN-38	10	enrichment score of fold-change	1.21268
127	H209_SN-38	100	enrichment score of fold-change	1.21268
130	H209_SN-38	10000	enrichment score of fold-change	1.21268
133	H209_SN-38	10005	enrichment score of fold-change	1.21268

## Sheet: H446
	FDA Approved Drugs	Candidates Drug id	Method	Enrichment score
1	H446_AZD4547	10	enrichment score of fold-change	1.21984
4	H446_AZD4547	10018	enrichment score of fold-change	1.21984
7	H446_AZD4547	1003	enrichment score of fold-change	1.21984
10	H446_AZD4547	10038	enrichment score of fold-change	1.21984
13	H446_AZD4547	10040	enrichment score of fold-change	1.21984
106	H446_ascorbate (vitamin C)	10008	enrichment score of fold-change	1.21881
109	H446_ascorbate (vitamin C)	10011	enrichment score of fold-change	1.21881
112	H446_ascorbate (vitamin C)	10012	enrichment score of fold-change	1.21881
115	H446_ascorbate (vitamin C)	10046	enrichment score of fold-change	1.21881
118	H446_ascorbate (vitamin C)	1005	enrichment score of fold-change	1.21881
16	H446_AZD8186	10010	enrichment score of fold-change	1.21779
19	H446_AZD8186	10011	enrichment score of fold-change	1.21779
22	H446_AZD8186	10029	enrichment score of fold-change	1.21779
25	H446_AZD8186	10041	enrichment score of fold-change	1.21779
28	H446_AZD8186	10042	enrichment score of fold-change	1.21779
31	H446_BAY AKT1	10032	enrichment score of fold-change	1.21779
34	H446_BAY AKT1	10035	enrichment score of fold-change	1.21779
37	H446_BAY AKT1	10038	enrichment score of fold-change	1.21779
40	H446_BAY AKT1	10058	enrichment score of fold-change	1.21779
43	H446_BAY AKT1	10156	enrichment score of fold-change	1.21779
61	H446_NPK76-II-72-1	10011	enrichment score of fold-change	1.21779
64	H446_NPK76-II-72-1	10012	enrichment score of fold-change	1.21779
67	H446_NPK76-II-72-1	10020	enrichment score of fold-change	1.21779
70	H446_NPK76-II-72-1	10023	enrichment score of fold-change	1.21779
73	H446_NPK76-II-72-1	10047	enrichment score of fold-change	1.21779
76	H446_SB590885	10010	enrichment score of fold-change	1.21779
79	H446_SB590885	10011	enrichment score of fold-change	1.21779
82	H446_SB590885	10029	enrichment score of fold-change	1.21779
85	H446_SB590885	10041	enrichment score of fold-change	1.21779
88	H446_SB590885	10042	enrichment score of fold-change	1.21779
91	H446_YM201636	10	enrichment score of fold-change	1.21779
94	H446_YM201636	10001	enrichment score of fold-change	1.21779
97	H446_YM201636	10005	enrichment score of fold-change	1.21779
100	H446_YM201636	10049	enrichment score of fold-change	1.21779
103	H446_YM201636	10055	enrichment score of fold-change	1.21779
46	H446_Fludarabine	0	enrichment score of fold-change	1.21575
49	H446_Fludarabine	1	enrichment score of fold-change	1.21575
52	H446_Fludarabine	100	enrichment score of fold-change	1.21575
55	H446_Fludarabine	10006	enrichment score of fold-change	1.21575
58	H446_Fludarabine	10007	enrichment score of fold-change	1.21575

## Sheet: H526
	FDA Approved Drugs	Candidates Drug id	Method	Enrichment score
211	H526_RVX-208	0	enrichment score of fold-change	1.2137
214	H526_RVX-208	10010	enrichment score of fold-change	1.2137
217	H526_RVX-208	10012	enrichment score of fold-change	1.2137
220	H526_RVX-208	10023	enrichment score of fold-change	1.2137
223	H526_RVX-208	10024	enrichment score of fold-change	1.2137
46	H526_Bromosporine	10042	enrichment score of fold-change	1.21268
49	H526_Bromosporine	10061	enrichment score of fold-change	1.21268
52	H526_Bromosporine	10172	enrichment score of fold-change	1.21268
55	H526_Bromosporine	10331	enrichment score of fold-change	1.21268
58	H526_Bromosporine	10338	enrichment score of fold-change	1.21268
121	H526_LGK974	0	enrichment score of fold-change	1.21268
124	H526_LGK974	10	enrichment score of fold-change	1.21268
127	H526_LGK974	100	enrichment score of fold-change	1.21268
130	H526_LGK974	10005	enrichment score of fold-change	1.21268
133	H526_LGK974	10008	enrichment score of fold-change	1.21268
166	H526_NU7441	0	enrichment score of fold-change	1.21268
169	H526_NU7441	10	enrichment score of fold-change	1.21268
172	H526_NU7441	100	enrichment score of fold-change	1.21268
175	H526_NU7441	10005	enrichment score of fold-change	1.21268
178	H526_NU7441	10008	enrichment score of fold-change	1.21268
31	H526_AZD5153	0	enrichment score of fold-change	1.21166
34	H526_AZD5153	10	enrichment score of fold-change	1.21166
37	H526_AZD5153	100	enrichment score of fold-change	1.21166
40	H526_AZD5153	10005	enrichment score of fold-change	1.21166
43	H526_AZD5153	10008	enrichment score of fold-change	1.21166
256	H526_XMD14-99	10012	enrichment score of fold-change	1.21166
259	H526_XMD14-99	10042	enrichment score of fold-change	1.21166
262	H526_XMD14-99	10046	enrichment score of fold-change	1.21166
265	H526_XMD14-99	10053	enrichment score of fold-change	1.21166
268	H526_XMD14-99	10055	enrichment score of fold-change	1.21166
1	H526_ABT737	10023	enrichment score of fold-change	1.21063
4	H526_ABT737	10042	enrichment score of fold-change	1.21063
7	H526_ABT737	10053	enrichment score of fold-change	1.21063
10	H526_ABT737	10067	enrichment score of fold-change	1.21063
13	H526_ABT737	10078	enrichment score of fold-change	1.21063
16	H526_AGI-6780	0	enrichment score of fold-change	1.21063
19	H526_AGI-6780	1	enrichment score of fold-change	1.21063
22	H526_AGI-6780	10	enrichment score of fold-change	1.21063
25	H526_AGI-6780	100	enrichment score of fold-change	1.21063
28	H526_AGI-6780	10010	enrichment score of fold-change	1.21063
61	H526_Dihydrorotenone	10023	enrichment score of fold-change	1.21063
64	H526_Dihydrorotenone	10042	enrichment score of fold-change	1.21063
67	H526_Dihydrorotenone	10053	enrichment score of fold-change	1.21063
70	H526_Dihydrorotenone	10067	enrichment score of fold-change	1.21063
73	H526_Dihydrorotenone	10078	enrichment score of fold-change	1.21063
91	H526_I-BET-762	10007	enrichment score of fold-change	1.21063
94	H526_I-BET-762	10009	enrichment score of fold-change	1.21063
97	H526_I-BET-762	1001	enrichment score of fold-change	1.21063
100	H526_I-BET-762	10025	enrichment score of fold-change	1.21063
103	H526_I-BET-762	10028	enrichment score of fold-change	1.21063
136	H526_Methotrexate	10018	enrichment score of fold-change	1.21063
139	H526_Methotrexate	10400	enrichment score of fold-change	1.21063
142	H526_Methotrexate	10413	enrichment score of fold-change	1.21063
145	H526_Methotrexate	10512	enrichment score of fold-change	1.21063
148	H526_Methotrexate	10533	enrichment score of fold-change	1.21063
151	H526_NPK76-II-72-1	10023	enrichment score of fold-change	1.21063
154	H526_NPK76-II-72-1	10042	enrichment score of fold-change	1.21063
157	H526_NPK76-II-72-1	10053	enrichment score of fold-change	1.21063
160	H526_NPK76-II-72-1	10067	enrichment score of fold-change	1.21063
163	H526_NPK76-II-72-1	10078	enrichment score of fold-change	1.21063
181	H526_OTX015	1004	enrichment score of fold-change	1.21063
184	H526_OTX015	10189	enrichment score of fold-change	1.21063
187	H526_OTX015	1063	enrichment score of fold-change	1.21063
190	H526_OTX015	10718	enrichment score of fold-change	1.21063
193	H526_OTX015	10819	enrichment score of fold-change	1.21063
226	H526_SGC-CBP30	10005	enrichment score of fold-change	1.21063
229	H526_SGC-CBP30	10008	enrichment score of fold-change	1.21063
232	H526_SGC-CBP30	10015	enrichment score of fold-change	1.21063
235	H526_SGC-CBP30	10026	enrichment score of fold-change	1.21063
238	H526_SGC-CBP30	10049	enrichment score of fold-change	1.21063
241	H526_Wnt-C59	10014	enrichment score of fold-change	1.21063
244	H526_Wnt-C59	10027	enrichment score of fold-change	1.21063
247	H526_Wnt-C59	10030	enrichment score of fold-change	1.21063
250	H526_Wnt-C59	10035	enrichment score of fold-change	1.21063
253	H526_Wnt-C59	10073	enrichment score of fold-change	1.21063
76	H526_GSK-LSD1	10	enrichment score of fold-change	1.20961
79	H526_GSK-LSD1	10077	enrichment score of fold-change	1.20961
82	H526_GSK-LSD1	10087	enrichment score of fold-change	1.20961
85	H526_GSK-LSD1	10091	enrichment score of fold-change	1.20961
88	H526_GSK-LSD1	10107	enrichment score of fold-change	1.20961
106	H526_Irinotecan	10007	enrichment score of fold-change	1.20859
109	H526_Irinotecan	10009	enrichment score of fold-change	1.20859
112	H526_Irinotecan	10014	enrichment score of fold-change	1.20859
115	H526_Irinotecan	10015	enrichment score of fold-change	1.20859
118	H526_Irinotecan	10017	enrichment score of fold-change	1.20859
196	H526_Picolinici-acid	10	enrichment score of fold-change	1.20859
199	H526_Picolinici-acid	10011	enrichment score of fold-change	1.20859
202	H526_Picolinici-acid	10029	enrichment score of fold-change	1.20859
205	H526_Picolinici-acid	10061	enrichment score of fold-change	1.20859
208	H526_Picolinici-acid	10067	enrichment score of fold-change	1.20859
