# Supplementary material for: Predicting transcriptional responses to novel chemical perturbations using deep generative model
Source: Research Square preprint supplement (doi:10.21203/rs.3.rs-3917469/v1), 2024-03-20
Supplement: Supplementary file 2 [file 7b43d452f40346c5f85f26ba.xlsx]

## Sheet: DMS114
	FDA Approved Drugs	Candidates Drug id	Method	Enrichment score
1	DMS114_AZD4547	(+)-Gallocatechin	enrichment score of fold-change	1.2045
4	DMS114_AZD4547	(+)-JQ1	enrichment score of fold-change	1.2045
7	DMS114_AZD4547	(-)-Epicatechin gallate	enrichment score of fold-change	1.2045
10	DMS114_AZD4547	(-)-Epigallocatechin Gallate	enrichment score of fold-change	1.2045
13	DMS114_AZD4547	(-)-epigallocatechin	enrichment score of fold-change	1.2045
16	DMS114_PD173074	(+)-Bicuculline	enrichment score of fold-change	1.2045
19	DMS114_PD173074	(+)-Catechin	enrichment score of fold-change	1.2045
22	DMS114_PD173074	(+)-Catechin hydrate	enrichment score of fold-change	1.2045
25	DMS114_PD173074	(+)-Isocorynoline	enrichment score of fold-change	1.2045
28	DMS114_PD173074	(+)-α-Lipoic acid	enrichment score of fold-change	1.2045

## Sheet: H196
	FDA Approved Drugs	Candidates Drug id	Method	Enrichment score
1	H196_JNK Inhibitor VIII	(+)-Bicuculline	enrichment score of fold-change	1.18916
4	H196_JNK Inhibitor VIII	(+)-Camphor	enrichment score of fold-change	1.18916
7	H196_JNK Inhibitor VIII	(+)-Catechin	enrichment score of fold-change	1.18916
10	H196_JNK Inhibitor VIII	(+)-Catechin hydrate	enrichment score of fold-change	1.18916
13	H196_JNK Inhibitor VIII	(+)-Fangchinoline	enrichment score of fold-change	1.18916
31	H196_STF-62247	(+)-Catechin	enrichment score of fold-change	1.18916
34	H196_STF-62247	(+)-Catechin hydrate	enrichment score of fold-change	1.18916
37	H196_STF-62247	(+)-Gallocatechin	enrichment score of fold-change	1.18916
40	H196_STF-62247	(+)-Isocorynoline	enrichment score of fold-change	1.18916
43	H196_STF-62247	(+)-α-Lipoic acid	enrichment score of fold-change	1.18916
16	H196_SGC0946	Darovasertib (LXS-196)	enrichment score of fold-change	1.18814
19	H196_SGC0946	SGC 0946	enrichment score of fold-change	1.18814
22	H196_SGC0946	Acalabrutinib (ACP-196)	enrichment score of fold-change	1.1877
25	H196_SGC0946	B-Raf IN 1	enrichment score of fold-change	1.1877
28	H196_SGC0946	CDKI-73	enrichment score of fold-change	1.1877

## Sheet: H209
	FDA Approved Drugs	Candidates Drug id	Method	Enrichment score
76	H209_Olaparib	(+)-Bicuculline	enrichment score of fold-change	1.21677
79	H209_Olaparib	(+)-Borneol	enrichment score of fold-change	1.21677
82	H209_Olaparib	(+)-JQ1	enrichment score of fold-change	1.21677
85	H209_Olaparib	(+)-Matrine	enrichment score of fold-change	1.21677
88	H209_Olaparib	(-)-Arctigenin	enrichment score of fold-change	1.21677
226	H209_ascorbate (vitamin C)	(+)-Bicuculline	enrichment score of fold-change	1.21677
229	H209_ascorbate (vitamin C)	(+)-Borneol	enrichment score of fold-change	1.21677
232	H209_ascorbate (vitamin C)	(+)-Camphor	enrichment score of fold-change	1.21677
235	H209_ascorbate (vitamin C)	(+)-Fangchinoline	enrichment score of fold-change	1.21677
238	H209_ascorbate (vitamin C)	(+)-Matrine	enrichment score of fold-change	1.21677
91	H209_PLX-4720	(+)-Camphor	enrichment score of fold-change	1.21575
94	H209_PLX-4720	(+)-Catechin	enrichment score of fold-change	1.21575
97	H209_PLX-4720	(+)-Catechin hydrate	enrichment score of fold-change	1.21575
100	H209_PLX-4720	(+)-Fangchinoline	enrichment score of fold-change	1.21575
103	H209_PLX-4720	(+)-Gallocatechin	enrichment score of fold-change	1.21575
151	H209_Talazoparib	(+)-Usniacin	enrichment score of fold-change	1.21575
154	H209_Talazoparib	2-Thiouracil	enrichment score of fold-change	1.21575
157	H209_Talazoparib	9-Aminoacridine	enrichment score of fold-change	1.21575
160	H209_Talazoparib	A2AR antagonist 1	enrichment score of fold-change	1.21575
163	H209_Talazoparib	AC480 (BMS-599626)	enrichment score of fold-change	1.21575
16	H209_Carmustine	(+)-Bicuculline	enrichment score of fold-change	1.21472
19	H209_Carmustine	(+)-JQ1	enrichment score of fold-change	1.21472
22	H209_Carmustine	(-)-Arctigenin	enrichment score of fold-change	1.21472
25	H209_Carmustine	(1R,2R)-trans-N-Boc-1,2-cyclohexanediamine	enrichment score of fold-change	1.21472
28	H209_Carmustine	(20R)-Protopanaxadiol	enrichment score of fold-change	1.21472
46	H209_Navitoclax	(+)-Camphor	enrichment score of fold-change	1.21472
49	H209_Navitoclax	(+)-Catechin	enrichment score of fold-change	1.21472
52	H209_Navitoclax	(+)-Catechin hydrate	enrichment score of fold-change	1.21472
55	H209_Navitoclax	(+)-Fangchinoline	enrichment score of fold-change	1.21472
58	H209_Navitoclax	(+)-Gallocatechin	enrichment score of fold-change	1.21472
61	H209_Niraparib	(+)-Bicuculline	enrichment score of fold-change	1.21472
64	H209_Niraparib	(+)-JQ1	enrichment score of fold-change	1.21472
67	H209_Niraparib	(-)-Arctigenin	enrichment score of fold-change	1.21472
70	H209_Niraparib	(1R,2R)-trans-N-Boc-1,2-cyclohexanediamine	enrichment score of fold-change	1.21472
73	H209_Niraparib	(20R)-Protopanaxadiol	enrichment score of fold-change	1.21472
106	H209_Rucaparib	(+)-Catechin	enrichment score of fold-change	1.21472
109	H209_Rucaparib	(+)-Catechin hydrate	enrichment score of fold-change	1.21472
112	H209_Rucaparib	(+)-Fangchinoline	enrichment score of fold-change	1.21472
115	H209_Rucaparib	(+)-Gallocatechin	enrichment score of fold-change	1.21472
118	H209_Rucaparib	(+)-Usniacin	enrichment score of fold-change	1.21472
166	H209_Topotecan	(+)-Isocorynoline	enrichment score of fold-change	1.21472
169	H209_Topotecan	2-Methoxy-1,4-naphthoquinone	enrichment score of fold-change	1.21472
172	H209_Topotecan	7-Aminocephalosporanic acid	enrichment score of fold-change	1.21472
175	H209_Topotecan	A66	enrichment score of fold-change	1.21472
178	H209_Topotecan	AGI-5198	enrichment score of fold-change	1.21472
181	H209_Veliparib	(+)-Bicuculline	enrichment score of fold-change	1.21472
184	H209_Veliparib	(+)-JQ1	enrichment score of fold-change	1.21472
187	H209_Veliparib	(-)-Arctigenin	enrichment score of fold-change	1.21472
190	H209_Veliparib	(1R,2R)-trans-N-Boc-1,2-cyclohexanediamine	enrichment score of fold-change	1.21472
193	H209_Veliparib	(20R)-Protopanaxadiol	enrichment score of fold-change	1.21472
196	H209_Venetoclax	(+)-Camphor	enrichment score of fold-change	1.21472
199	H209_Venetoclax	(+)-Catechin	enrichment score of fold-change	1.21472
202	H209_Venetoclax	(+)-Catechin hydrate	enrichment score of fold-change	1.21472
205	H209_Venetoclax	(+)-Fangchinoline	enrichment score of fold-change	1.21472
208	H209_Venetoclax	(+)-Gallocatechin	enrichment score of fold-change	1.21472
211	H209_WZ4003	(+)-Catechin	enrichment score of fold-change	1.21472
214	H209_WZ4003	(+)-Catechin hydrate	enrichment score of fold-change	1.21472
217	H209_WZ4003	(+)-Fangchinoline	enrichment score of fold-change	1.21472
220	H209_WZ4003	(+)-Gallocatechin	enrichment score of fold-change	1.21472
223	H209_WZ4003	(+)-Usniacin	enrichment score of fold-change	1.21472
1	H209_ABT737	(+)-Catechin	enrichment score of fold-change	1.2137
4	H209_ABT737	(+)-Catechin hydrate	enrichment score of fold-change	1.2137
7	H209_ABT737	(+)-Fangchinoline	enrichment score of fold-change	1.2137
10	H209_ABT737	(+)-Gallocatechin	enrichment score of fold-change	1.2137
13	H209_ABT737	(+)-Isocorynoline	enrichment score of fold-change	1.2137
136	H209_Serdemetan	(+)-Catechin	enrichment score of fold-change	1.2137
139	H209_Serdemetan	(+)-Catechin hydrate	enrichment score of fold-change	1.2137
142	H209_Serdemetan	(+)-Fangchinoline	enrichment score of fold-change	1.2137
145	H209_Serdemetan	(+)-Gallocatechin	enrichment score of fold-change	1.2137
148	H209_Serdemetan	(+)-Isocorynoline	enrichment score of fold-change	1.2137
31	H209_Irinotecan	(+)-Borneol	enrichment score of fold-change	1.21268
34	H209_Irinotecan	(+)-Camphor	enrichment score of fold-change	1.21268
37	H209_Irinotecan	(+)-Catechin	enrichment score of fold-change	1.21268
40	H209_Irinotecan	(+)-Catechin hydrate	enrichment score of fold-change	1.21268
43	H209_Irinotecan	(+)-Fangchinoline	enrichment score of fold-change	1.21268
121	H209_SN-38	(+)-Borneol	enrichment score of fold-change	1.21268
124	H209_SN-38	(+)-Camphor	enrichment score of fold-change	1.21268
127	H209_SN-38	(+)-Catechin	enrichment score of fold-change	1.21268
130	H209_SN-38	(+)-Catechin hydrate	enrichment score of fold-change	1.21268
133	H209_SN-38	(+)-Fangchinoline	enrichment score of fold-change	1.21268

## Sheet: H446
	FDA Approved Drugs	Candidates Drug id	Method	Enrichment score
1	H446_AZD4547	(+)-Borneol	enrichment score of fold-change	1.21984
4	H446_AZD4547	(+)-JQ1	enrichment score of fold-change	1.21984
7	H446_AZD4547	(-)-Arctigenin	enrichment score of fold-change	1.21984
10	H446_AZD4547	(-)-Blebbistatin	enrichment score of fold-change	1.21984
13	H446_AZD4547	(-)-Epicatechin gallate	enrichment score of fold-change	1.21984
106	H446_ascorbate (vitamin C)	(+)-Bicuculline	enrichment score of fold-change	1.21881
109	H446_ascorbate (vitamin C)	(+)-Camphor	enrichment score of fold-change	1.21881
112	H446_ascorbate (vitamin C)	(+/-)-Sulfinpyrazone	enrichment score of fold-change	1.21881
115	H446_ascorbate (vitamin C)	(-)-Sparteine Sulfate	enrichment score of fold-change	1.21881
118	H446_ascorbate (vitamin C)	(20R)-Ginsenoside Rh1	enrichment score of fold-change	1.21881
16	H446_AZD8186	(+)-Camphor	enrichment score of fold-change	1.21779
19	H446_AZD8186	(+)-Usniacin	enrichment score of fold-change	1.21779
22	H446_AZD8186	(-)-Sparteine Sulfate	enrichment score of fold-change	1.21779
25	H446_AZD8186	(E/Z)-BCI	enrichment score of fold-change	1.21779
28	H446_AZD8186	(Rac)-JBJ-04-125-02	enrichment score of fold-change	1.21779
31	H446_BAY AKT1	(+)-JQ1	enrichment score of fold-change	1.21779
34	H446_BAY AKT1	(卤)-Equol	enrichment score of fold-change	1.21779
37	H446_BAY AKT1	2-Methoxy-1,4-naphthoquinone	enrichment score of fold-change	1.21779
40	H446_BAY AKT1	2-Methoxyestradiol (2-MeOE2)	enrichment score of fold-change	1.21779
43	H446_BAY AKT1	23-Hydroxybetulinic acid	enrichment score of fold-change	1.21779
61	H446_NPK76-II-72-1	(+)-Bicuculline	enrichment score of fold-change	1.21779
64	H446_NPK76-II-72-1	(+)-Borneol	enrichment score of fold-change	1.21779
67	H446_NPK76-II-72-1	(+)-Camphor	enrichment score of fold-change	1.21779
70	H446_NPK76-II-72-1	(+)-伪-Lipoic acid	enrichment score of fold-change	1.21779
73	H446_NPK76-II-72-1	(+/-)-Sulfinpyrazone	enrichment score of fold-change	1.21779
76	H446_SB590885	(+)-Camphor	enrichment score of fold-change	1.21779
79	H446_SB590885	(+)-Usniacin	enrichment score of fold-change	1.21779
82	H446_SB590885	(-)-Sparteine Sulfate	enrichment score of fold-change	1.21779
85	H446_SB590885	(E/Z)-BCI	enrichment score of fold-change	1.21779
88	H446_SB590885	(Rac)-JBJ-04-125-02	enrichment score of fold-change	1.21779
91	H446_YM201636	(Rac)-JBJ-04-125-02	enrichment score of fold-change	1.21779
94	H446_YM201636	(S)-crizotinib	enrichment score of fold-change	1.21779
97	H446_YM201636	(Z)-4-Hydroxytamoxifen	enrichment score of fold-change	1.21779
100	H446_YM201636	10058-F4	enrichment score of fold-change	1.21779
103	H446_YM201636	2'-Deoxy-5-Fluorocytidine	enrichment score of fold-change	1.21779
46	H446_Fludarabine	(+)-Camphor	enrichment score of fold-change	1.21575
49	H446_Fludarabine	(+)-Catechin	enrichment score of fold-change	1.21575
52	H446_Fludarabine	(+)-Catechin hydrate	enrichment score of fold-change	1.21575
55	H446_Fludarabine	(+)-Gallocatechin	enrichment score of fold-change	1.21575
58	H446_Fludarabine	(+)-Isocorynoline	enrichment score of fold-change	1.21575

## Sheet: H526
	FDA Approved Drugs	Candidates Drug id	Method	Enrichment score
211	H526_RVX-208	(+)-Camphor	enrichment score of fold-change	1.2137
214	H526_RVX-208	(+)-Matrine	enrichment score of fold-change	1.2137
217	H526_RVX-208	(+)-Usniacin	enrichment score of fold-change	1.2137
220	H526_RVX-208	(+)-伪-Lipoic acid	enrichment score of fold-change	1.2137
223	H526_RVX-208	(-)-Menthol	enrichment score of fold-change	1.2137
46	H526_Bromosporine	10-Hydroxydecanoic acid	enrichment score of fold-change	1.21268
49	H526_Bromosporine	1V209 (TLR7 agonist T7)	enrichment score of fold-change	1.21268
52	H526_Bromosporine	3-TYP	enrichment score of fold-change	1.21268
55	H526_Bromosporine	4-Hydroxyquinazoline	enrichment score of fold-change	1.21268
58	H526_Bromosporine	4-Octyl Itaconate	enrichment score of fold-change	1.21268
121	H526_LGK974	(+)-Camphor	enrichment score of fold-change	1.21268
124	H526_LGK974	(+)-Fangchinoline	enrichment score of fold-change	1.21268
127	H526_LGK974	(+)-Usniacin	enrichment score of fold-change	1.21268
130	H526_LGK974	(+)-伪-Lipoic acid	enrichment score of fold-change	1.21268
133	H526_LGK974	(-)-Menthol	enrichment score of fold-change	1.21268
166	H526_NU7441	(+)-Camphor	enrichment score of fold-change	1.21268
169	H526_NU7441	(+)-Fangchinoline	enrichment score of fold-change	1.21268
172	H526_NU7441	(+)-Usniacin	enrichment score of fold-change	1.21268
175	H526_NU7441	(+)-伪-Lipoic acid	enrichment score of fold-change	1.21268
178	H526_NU7441	(-)-Menthol	enrichment score of fold-change	1.21268
31	H526_AZD5153	(+)-Camphor	enrichment score of fold-change	1.21166
34	H526_AZD5153	(+)-Fangchinoline	enrichment score of fold-change	1.21166
37	H526_AZD5153	(+)-Usniacin	enrichment score of fold-change	1.21166
40	H526_AZD5153	(+)-伪-Lipoic acid	enrichment score of fold-change	1.21166
43	H526_AZD5153	(-)-Menthol	enrichment score of fold-change	1.21166
256	H526_XMD14-99	(+)-Bicuculline	enrichment score of fold-change	1.21166
259	H526_XMD14-99	(-)-Menthol	enrichment score of fold-change	1.21166
262	H526_XMD14-99	(6-)蔚-鈥婣minocaproic acid	enrichment score of fold-change	1.21166
265	H526_XMD14-99	10-Hydroxydecanoic acid	enrichment score of fold-change	1.21166
268	H526_XMD14-99	10058-F4	enrichment score of fold-change	1.21166
1	H526_ABT737	(+)-Borneol	enrichment score of fold-change	1.21063
4	H526_ABT737	(+)-Camphor	enrichment score of fold-change	1.21063
7	H526_ABT737	(+)-伪-Lipoic acid	enrichment score of fold-change	1.21063
10	H526_ABT737	(-)-Sparteine Sulfate	enrichment score of fold-change	1.21063
13	H526_ABT737	1,5-Anhydro-D-glucitol	enrichment score of fold-change	1.21063
16	H526_AGI-6780	(+)-Catechin	enrichment score of fold-change	1.21063
19	H526_AGI-6780	(+)-Catechin hydrate	enrichment score of fold-change	1.21063
22	H526_AGI-6780	(+)-Fangchinoline	enrichment score of fold-change	1.21063
25	H526_AGI-6780	(+)-Gallocatechin	enrichment score of fold-change	1.21063
28	H526_AGI-6780	(+)-Isocorynoline	enrichment score of fold-change	1.21063
61	H526_Dihydrorotenone	(+)-Borneol	enrichment score of fold-change	1.21063
64	H526_Dihydrorotenone	(+)-Camphor	enrichment score of fold-change	1.21063
67	H526_Dihydrorotenone	(+)-伪-Lipoic acid	enrichment score of fold-change	1.21063
70	H526_Dihydrorotenone	(-)-Sparteine Sulfate	enrichment score of fold-change	1.21063
73	H526_Dihydrorotenone	1,5-Anhydro-D-glucitol	enrichment score of fold-change	1.21063
91	H526_I-BET-762	(-)-Huperzine A (HupA)	enrichment score of fold-change	1.21063
94	H526_I-BET-762	14-Deoxy-11,12-didehydroandrographolide	enrichment score of fold-change	1.21063
97	H526_I-BET-762	2-Methoxy-1,4-naphthoquinone	enrichment score of fold-change	1.21063
100	H526_I-BET-762	23-Hydroxybetulinic acid	enrichment score of fold-change	1.21063
103	H526_I-BET-762	ABTL-0812	enrichment score of fold-change	1.21063
136	H526_Methotrexate	Alpha-Mangostin	enrichment score of fold-change	1.21063
139	H526_Methotrexate	BGP-15 2HCl	enrichment score of fold-change	1.21063
142	H526_Methotrexate	Bufexamac	enrichment score of fold-change	1.21063
145	H526_Methotrexate	C-021	enrichment score of fold-change	1.21063
148	H526_Methotrexate	Epacadostat (INCB024360)	enrichment score of fold-change	1.21063
151	H526_NPK76-II-72-1	(+)-Borneol	enrichment score of fold-change	1.21063
154	H526_NPK76-II-72-1	(+)-Camphor	enrichment score of fold-change	1.21063
157	H526_NPK76-II-72-1	(+)-伪-Lipoic acid	enrichment score of fold-change	1.21063
160	H526_NPK76-II-72-1	(-)-Sparteine Sulfate	enrichment score of fold-change	1.21063
163	H526_NPK76-II-72-1	1,5-Anhydro-D-glucitol	enrichment score of fold-change	1.21063
181	H526_OTX015	A-1210477	enrichment score of fold-change	1.21063
184	H526_OTX015	APTO-253	enrichment score of fold-change	1.21063
187	H526_OTX015	Alamandine	enrichment score of fold-change	1.21063
190	H526_OTX015	Angiotensin II human Acetate	enrichment score of fold-change	1.21063
193	H526_OTX015	Bazedoxifene (TSE-424) acetate	enrichment score of fold-change	1.21063
226	H526_SGC-CBP30	(R)-baclofen	enrichment score of fold-change	1.21063
229	H526_SGC-CBP30	3PO	enrichment score of fold-change	1.21063
232	H526_SGC-CBP30	4'-Demethylpodophyllotoxin	enrichment score of fold-change	1.21063
235	H526_SGC-CBP30	4-Demethylepipodophyllotoxin(NSC-122819,VM-26)	enrichment score of fold-change	1.21063
238	H526_SGC-CBP30	4-Hydroxybenzyl alcohol	enrichment score of fold-change	1.21063
241	H526_Wnt-C59	(-)-p-Bromotetramisole Oxalate	enrichment score of fold-change	1.21063
244	H526_Wnt-C59	(卤)-Equol	enrichment score of fold-change	1.21063
247	H526_Wnt-C59	1,4-Cineole	enrichment score of fold-change	1.21063
250	H526_Wnt-C59	2,6-Dihydroxyanthraquinone	enrichment score of fold-change	1.21063
253	H526_Wnt-C59	AG-490 (Tyrphostin B42)	enrichment score of fold-change	1.21063
76	H526_GSK-LSD1	(-)-Epicatechin gallate	enrichment score of fold-change	1.20961
79	H526_GSK-LSD1	(-)-Epigallocatechin Gallate	enrichment score of fold-change	1.20961
82	H526_GSK-LSD1	(-)-epigallocatechin	enrichment score of fold-change	1.20961
85	H526_GSK-LSD1	(R)-(-)-Gossypol acetic acid	enrichment score of fold-change	1.20961
88	H526_GSK-LSD1	(S)-crizotinib	enrichment score of fold-change	1.20961
106	H526_Irinotecan	(-)-Parthenolide	enrichment score of fold-change	1.20859
109	H526_Irinotecan	(20R)Ginsenoside Rg3	enrichment score of fold-change	1.20859
112	H526_Irinotecan	(20R)Ginsenoside Rh2	enrichment score of fold-change	1.20859
115	H526_Irinotecan	2,2'-Cyclouridine	enrichment score of fold-change	1.20859
118	H526_Irinotecan	2-Methoxyestradiol (2-MeOE2)	enrichment score of fold-change	1.20859
196	H526_Picolinici-acid	(+)-Borneol	enrichment score of fold-change	1.20859
199	H526_Picolinici-acid	(-)-Epicatechin gallate	enrichment score of fold-change	1.20859
202	H526_Picolinici-acid	(-)-Sparteine Sulfate	enrichment score of fold-change	1.20859
205	H526_Picolinici-acid	(E/Z)-BCI	enrichment score of fold-change	1.20859
208	H526_Picolinici-acid	(S)-crizotinib	enrichment score of fold-change	1.20859
